# Supplementary material
Source: PubMed Central journal article supplement (PMC10427843)
Supplement: sj-pdf-1-inc-10.1177_1751143720971541.pdf [file sj-pdf-1-inc-10.1177_1751143720971541.pdf]

Supplementary Table 1 Ventilatory parameters for mechanically ventilated patients

| Time following commencement of IMV | Driving pressure (cmH <sub>2</sub> O) |              |               |               | PaO <sub>2</sub> /FiO <sub>2</sub> ratio (kPa) |                    |                    |               |
|------------------------------------|---------------------------------------|--------------|---------------|---------------|------------------------------------------------|--------------------|--------------------|---------------|
|                                    | Overall                               | Survivors    | Non-survivors | P-value       | Overall                                        | Survivors          | Non-survivors      | P-value       |
| 6 hours [n = 68]                   | 16 (14 – 20)                          | 16 (13 – 18) | 18 (14 – 18)  | 0.135         | 20.0 (14.9 – 25.8)                             | 22.1 (17.0 – 29.5) | 16.6 (13.3 – 22.0) | <b>0.012*</b> |
| 12 hours [n = 67]                  | 16 (14 – 20)                          | 16 (14 – 18) | 18 (15 – 20)  | 0.066         | 21.4 (15.5 – 27.3)                             | 24.4 (19.3 – 33.1) | 17.4 (13.6 – 23.4) | <b>0.001*</b> |
| 24 hours [n = 59]                  | 16 (14 – 20)                          | 16 (14 – 19) | 18 (16 – 22)  | <b>0.036*</b> | 20.5 (15.8 – 28.5)                             | 23.8 (18.7 – 31.1) | 17.8 (13.4 – 26.1) | <b>0.024*</b> |
| 36 hours [n = 52]                  | 16 (14 – 20)                          | 16 (14 – 20) | 18 (14 – 20)  | 0.409         | 20.8 (15.8 – 26.1)                             | 22.8 (17.8 – 27.1) | 17.8 (15.0 – 26.1) | 0.111         |
| 48 hours [n = 47]                  | 16 (14 – 22)                          | 16 (13 – 16) | 18 (14 – 18)  | 0.387         | 20.8 (16.1 – 25.3)                             | 23.7 (18.0 – 27.7) | 17.2 (15.3 – 17.2) | 0.076         |
| 72 hours [n = 41]                  | 16 (12 – 20)                          | 15 (12 – 20) | 18 (14 – 20)  | <b>0.041*</b> | 18.3 (14.9 – 24.6)                             | 22.0 (16.9 – 28.2) | 16.8 (14.2 – 21.0) | <b>0.024*</b> |

**Supplementary Table 1 Legend:**

Data are recorded as median (interquartile range). IMV = Invasive Mechanical Ventilation. FiO<sub>2</sub> = Fractional Inspired Concentration of Oxygen. PaO<sub>2</sub> = Arterial Partial Pressure of Oxygen. Mann Whitney U tests were performed to compare medians between survivors and non-survivors.

\* Denotes a P-value <0.05 which is deemed to reach statistical significance

Supplementary Table 2: Serial laboratory investigation values

|                                         | 24 hours post intubation<br>[n = 67] | 48 hours post intubation       | 72 hours post intubation      | Peak value during first 72 hours on ICU | Peak value during ICU admission                 |
|-----------------------------------------|--------------------------------------|--------------------------------|-------------------------------|-----------------------------------------|-------------------------------------------------|
| White blood cells (x10 <sup>9</sup> /L) | 10.4 (7.6 – 13.6)                    | 9.6 (7.4 – 12.2)               | 10.6 (8.0 – 12.5)             | 11.7 (9.0 – 14.9)                       | --                                              |
| Neutrophils (x10 <sup>9</sup> /L)       | 8.9 (6.4 – 11.9)                     | 8.5 (5.8 – 10.8)               | 9.5 (6.2 – 11.2)              | 11.4 (8.4 – 13.4)                       | --                                              |
| Lymphocytes (x10 <sup>9</sup> /L)       | 0.9 (0.7 – 1.3)                      | 0.7 (0.6 – 1.0)                | 0.8 (0.5 – 1.0)               | 0.6 (0.4 – 0.8)*                        | 0.5 (0.4 – 0.7)*<br>Day 3 (1 – 5)               |
| Platelets (x10 <sup>9</sup> /L)         | 223 (188 – 307)                      | 239 (198 – 313)                | 263 (224 – 356)               | 271 (239 – 373)                         | --                                              |
| Creatinine (µmol/L)                     | 103 (80 – 158)                       | 104 (80 – 180)                 | 111 (81.3 – 203)              | 112 (93 – 227)                          | 147 (100 – 373)<br>Day 4 (2 – 9)                |
| C-reactive protein (mg/L)               | 209 (151 – 337)                      | 303 (193 – 367)                | 281 (173 – 351)               | 310 (208 – 369)                         | 344 (283 – 434)<br>Day 4 (3 – 6)                |
| Ferritin (µg/L)                         | 2219 (1138 – 3305)<br>[n=24]         | 1590 (1008 – 2696)<br>[n = 22] | 1921 (763 – 2827)<br>[n = 25] | 1948 (827 – 4254)<br>[n = 57]           | 2170 (1034 – 3711)<br>Day 5 (3 – 8)<br>[n = 69] |
| LDH (IU/L)                              | --                                   | --                             | --                            | --                                      | 578 (469 – 763)<br>Day 3 (1 – 7)<br>[n = 35]    |
| Troponin (ng/L)                         | --                                   | --                             | --                            | --                                      | 38 (13 – 80)<br>Day 4 (2 – 11)<br>[n = 57]      |
| D-dimer (multiple of ULN of assay)      | --                                   | --                             | --                            | --                                      | 16.2 (9.7 – 35.5)<br>Day 8 (4 – 12)<br>[n = 44] |

**Supplementary Table 2 Legend:**

Data are recorded as median (interquartile range) or number/total (percentage) as appropriate. ICU = Intensive Care Unit. LDH = Lactate Dehydrogenase. ULN = Upper Limit of Normal. D-dimer is reported as a multiple of the upper limit of normal for the assay in question as multiple assays were in use. The lowest value of the troponin assay was <13 ng/L and the greatest value of the ferritin assay was >6000 µg/L. When these values were obtained '13' and '6000' were inputted respectively. Peak value during ICU admission includes all patients including those who did not receive IMV. The day into ICU admission at which a peak (or trough in the case of lymphocytes) value was obtained is noted.

\* The trough value of lymphocyte count was recorded rather than the peak

Supplementary Table 3: Univariate analysis of variables at admission to ICU

|                                                    |                                                                                       | Survivors (n=47)             | Non-Survivors (n=38)         | P-value      |
|----------------------------------------------------|---------------------------------------------------------------------------------------|------------------------------|------------------------------|--------------|
| Age (years) †                                      |                                                                                       | 53.1 (44.6 – 62.7)<br>[n=47] | 59.9 (53.9 – 66.2)           | <b>0.002</b> |
| Male sex §                                         |                                                                                       | 37/47 (78.7%)                | 27/38 (71.1%)                | 0.415        |
| Ethnicity §                                        | White                                                                                 | 15/47 (31.9%)                | 13/38 (34.2%)                | 0.823        |
|                                                    | Black, African, Caribbean & Black British                                             | 21/47 (44.7%)                | 16/38 (42.1%)                | 0.830        |
|                                                    | Asian & Asian British                                                                 | 5/47 (10.6%)                 | 4/38 (10.5%)                 | 0.987        |
|                                                    | Mixed, 'other' & not declared                                                         | 6/47 (12.8%)                 | 5/38 (13.2%)                 | 0.957        |
|                                                    | Black, Asian and Minority Ethnic (BAME) (including mixed, 'other' and not declared) § | 32/47 (68.1%)                | 25/38 (65.8%)                | 0.823        |
| <b>Comorbidities</b>                               |                                                                                       |                              |                              |              |
| Hypertension                                       |                                                                                       | 26/47 (55.3%)                | 18/38 (47.4%)                | 0.466        |
| Diabetes mellitus Type 2                           |                                                                                       | 17/47 (36.2%)                | 10/38 (26.3%)                | 0.332        |
| BMI (kg.m <sup>-2</sup> ) †                        |                                                                                       | 31.1 (27.2 – 34.7)<br>[n=36] | 29.1 (24.7 – 31.2)<br>[n=35] | <b>0.065</b> |
| Obese (BMI 30 kg.m <sup>-2</sup> and above) [n=78] |                                                                                       | 22/42 (52.4%)                | 16/36 (44.4%)                | 0.484        |
| Chronic kidney disease                             |                                                                                       | 6/47 (12.8%)                 | 5/38 (13.2%)                 | 0.957        |
| Active malignancy                                  |                                                                                       |                              |                              |              |
| Heart failure                                      |                                                                                       | 2/47 (4.3%)                  | 0/38 (0.0%)                  | 0.198        |
| Chronic obstructive pulmonary disease              |                                                                                       | 0/47 (0.0%)                  | 2/38 (5.2%)                  | 0.111        |
| Asthma                                             |                                                                                       | 4/47 (8.5%)                  | 7/38 (18.4%)                 | 0.176        |
| Smoking history (current or previous) [n=82]       |                                                                                       | 13/45 (28.9%)                | 12/37 (32.4%)                | 0.729        |
| Rockwood clinical frailty scale                    | 1                                                                                     | 5/47 (10.6%)                 | 4/38 (10.5%)                 | 0.397        |
|                                                    | 2                                                                                     | 30/47 (63.8%)                | 17/38 (44.7%)                |              |
|                                                    | 3                                                                                     | 9/47 (19.1%)                 | 11/38 (28.9%)                |              |
|                                                    | 4                                                                                     | 3/47 (6.4%)                  | 4/38 (10.5%)                 |              |
|                                                    | 5 and above                                                                           | 0/47 (0.0%)                  | 2/38 (5.3%)                  |              |
| <b>Regular medications</b>                         |                                                                                       |                              |                              |              |
| Regular non-steroidal anti-inflammatory drug       |                                                                                       | 1/47 (2.1%)                  | 1/38 (2.6%)                  | 0.879        |
| Angiotensin converting enzyme inhibitor            |                                                                                       | 7/47 (14.9%)                 | 7/38 (18.4%)                 | 0.663        |
| Angiotensin II receptor antagonist                 |                                                                                       | 8/47 (17.0%)                 | 4/38 (10.5%)                 | 0.393        |
| Oral hypoglycaemic agent                           |                                                                                       | 15/47 (31.9%)                | 10/38 (26.3%)                | 0.573        |
| Insulin                                            |                                                                                       | 4/47 (8.5%)                  | 5/38 (13.2%)                 | 0.489        |
| Regular oral steroid                               |                                                                                       | 3/47 (6.4%)                  | 1/38 (2.6%)                  | 0.417        |

|                                                             |  |                              |                              |       |
|-------------------------------------------------------------|--|------------------------------|------------------------------|-------|
| Other immunosuppressant or immunomodulator                  |  | 4/47 (8.5%)                  | 3/38 (7.9%)                  | 0.918 |
| <b>Admission laboratory parameters</b>                      |  |                              |                              |       |
| Haemoglobin (g/L)                                           |  | 131 (118 – 143)<br>[n=47]    | 136 (123 – 149)<br>[n=38]    | 0.166 |
| White blood cells (x10 <sup>9</sup> /L)                     |  | 9.1 (7.0 – 13.2)<br>[n=47]   | 8.8 (6.7 – 12.5)<br>[n=38]   | 0.316 |
| Neutrophils (x10 <sup>9</sup> /L)                           |  | 8.0 (5.6 – 11.9)<br>[n=47]   | 7.4 (5.3 – 10.0)<br>[n=38]   | 0.263 |
| Lymphocytes (admission)                                     |  | 0.9 (0.6 – 1.1)<br>[n=47]    | 0.9 (0.6 – 1.1)<br>[n=38]    | 0.736 |
| Lymphocytopenia (Lymphocyte count <1.0 x10 <sup>9</sup> /L) |  | 28/47 (60.0%)                | 22/38 (57.9%)                | 0.876 |
| Platelet (admission)                                        |  | 226 (189 – 289)<br>[n=47]    | 228 (178 – 289)<br>[n=38]    | 0.798 |
| Urea (mmol/L)                                               |  | 6.6 (4.0 – 9.6)<br>[n=46]    | 6.1 (4.3 – 9.1)<br>[n=36]    | 0.911 |
| Creatinine (µmol/L)                                         |  | 98 (75 – 115)<br>[n=47]      | 92 (68 – 105)<br>[n=38]      | 0.245 |
| C-reactive protein (mg/L)                                   |  | 182 (139 – 252)<br>[n=47]    | 185 (94 – 235)<br>[n=38]     | 0.353 |
| Alanine aminotransferase (IU/L)                             |  | 35 (23 – 64)<br>[n=47]       | 39 (27 – 56)<br>[n=32]       | 0.491 |
| Ferritin (µg/L)                                             |  | 1966 (788 – 3883)<br>[n=27]  | 1937 (1166 – 2851)<br>[n=19] | 0.850 |
| HbA1c (mmol/mol)                                            |  | 45 (38 – 87)<br>[n=23]       | 44 (35 – 68)<br>[n=19]       | 0.658 |
| PaO <sub>2</sub> /FiO <sub>2</sub> ratio (kPa)              |  | 9.14 (7.19 – 11.7)<br>[n=39] | 7.78 (6.27 – 11.9)<br>[n=34] | 0.248 |
| APACHE II score                                             |  | 13 (11 – 18)<br>[n=45]       | 15 (13 – 17)<br>[n=37]       | 0.149 |
| Acute kidney injury (AKI) on admission                      |  | 7/47 (14.9%)                 | 3/38 (7.9%)                  | 0.319 |

**Supplementary Table 3 Legend:**

Data are recorded as median (interquartile range) or number/total (percentage) as appropriate. HbA1c = Glycated Haemoglobin. APACHE II score = Acute physiology and chronic health evaluation II score. BMI = body mass index. All values and calculated indices are those closest available to time of intensive care admission +/- 72 hours with the exception of HbA1c which was included if within six-months of admission. Note: Numerical height and weight data were available for 71 patients. A further seven patients had high BMI documented as a comorbidity hence the discrepancy in denominator between the two BMI variables. Criteria for inclusion of variable in regression model are: P-value <0.10 (denoted by †) and values of particular clinical interest irrespective of P-value (denoted by §).
